# Supplementary material for: Iron elevation and adipose tissue remodeling in the epididymal depot of a mouse model of polygenic obesity
Source: PubMed Central journal article supplement (PMC5484604; doi:10.1371/journal.pone.0179889), 2017-06-26

# S2 Fig

DAPI/Nitrotyrosine(20X)

Pancreas

Liver

eAT

NI

HI

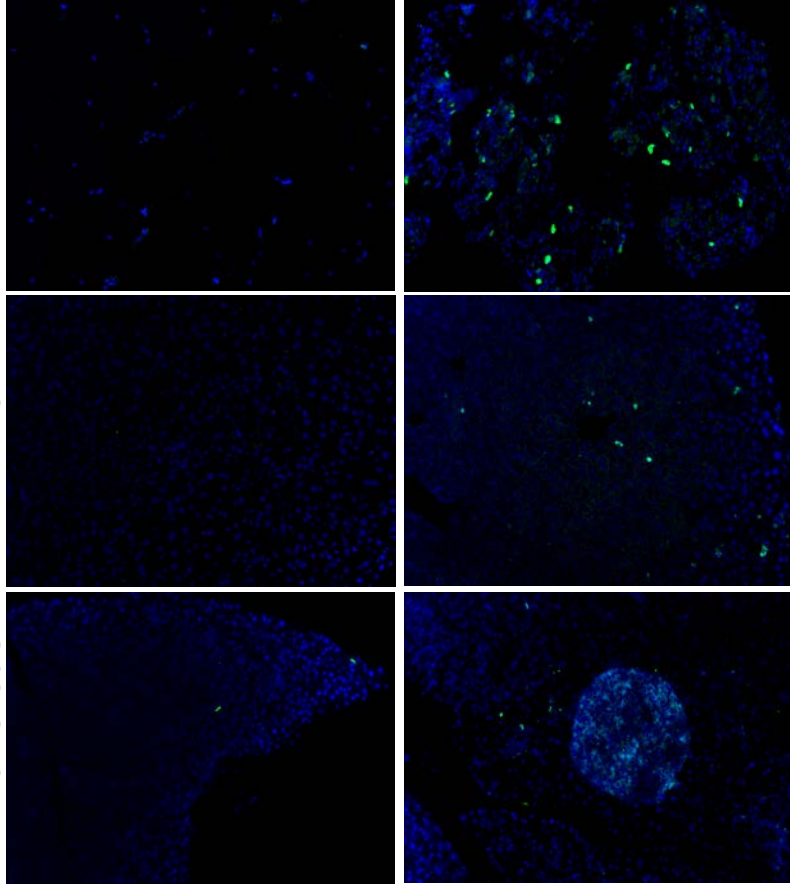

Supplement: pone.0179889.s002.pdf [file pone.0179889.s002.pdf]
